# Supplementary material for: Gender and age disparities in risk factor burden in China: a GBD 2021 analysis with projections to 2050
Source: Research Square preprint supplement (doi:10.21203/rs.3.rs-7332902/v1), 2025-09-01
Supplement: Supplementary file 1 [file 9ea5c0d1f1360eb03f19a00b.xlsx]

## Sheet: Sheet1
Table 1. Sex and age-specific leading ten detailed risk factors, by summary exposure values (SEVs).
	<5 years			5-14 years			15-49 years			50-69 years			70+ years
	leading 10 risk factors	SEV 2021 (%)		leading 10 risk factors	SEV 2021 (%)		leading 10 risk factors	SEV 2021 (%)		leading 10 risk factors	SEV 2021 (%)		leading 10 risk factors	SEV 2021 (%)
Male	Secondhand smoke	57.21(66.81,47.78)		Secondhand smoke	66.2(74.17,56.49)		Diet Low in Omega-6 Polyunsaturated Fatty Acids	82.54(95.13,49.51)		Diet high in sodium	82.91(98.86,56.11)		Diet Low in Omega-6 Polyunsaturated Fatty Acids	80.51(94.84,42.66)
	Discontinued breastfeeding	48.9(53.29,44.52)		Ambient particulate matter pollution	46.2(58.43,24.55)		Diet high in sodium	62.6(94.13,26.2)		Diet Low in Omega-6 Polyunsaturated Fatty Acids	82.54(94.81,48.34)		Diet high in sodium	78.6(98.27,42.76)
	Ambient particulate matter pollution	48.7(59.97,29.51)		High temperature	33.56(40.64,26.26)		Diet low in milk	51.76(73.89,48.04)		Lead exposure	57.16(66.96,0)		Diet low in whole grains	65.5(75.06,54.95)
	High temperature	33.34(40.39,26.13)		Unsafe sanitation	29.01(38.07,21.39)		Ambient particulate matter pollution	46.27(55.06,29.91)		Diet low in whole grains	55.66(64.86,45.25)		Lead exposure	65.33(75.09,0)
	Non-exclusive breastfeeding	31.13(40.35,23.56)		Unsafe water source	27.19(43.87,15.77)		High LDL cholesterol	43.82(64.74,27.46)		Diet low in milk	52.49(78.44,48.37)		Diet high in red meat	53.14(72.66,0)
	Unsafe sanitation	28.82(37.97,21.24)		Low temperature	26.45(30.28,23.56)		Smoking	43.38(46.27,40.44)		Diet high in red meat	49.62(70.24,0)		Diet low in milk	52.42(77.93,48.32)
	Unsafe water source	27.01(43.66,15.68)		High body-mass index	20.03(21.53,18.75)		Diet high in red meat	41.91(59.07,0)		Ambient particulate matter pollution	47.15(55.43,32.54)		Ambient particulate matter pollution	47.49(55.83,32.78)
	Low temperature	26.38(30.2,23.5)		Nitrogen dioxide pollution	18.31(55.52,0)		Diet low in whole grains	41.19(47.14,32.81)		Smoking	45.85(48.98,42.86)		High systolic blood pressure	46.16(66.03,28.51)
	High body-mass index	24.09(26.21,22.11)		Bullying victimization	12.61(22.62,6.52)		Lead exposure	34.77(43.64,0)		High LDL cholesterol	44.47(59.08,31.77)		High LDL cholesterol	43.15(53.45,34.16)
	Short gestation	20.13(24.04,15.97)		No access to handwashing facility	6.7(7.91,3.32)		Secondhand smoke	33.34(38.12,28.64)		High systolic blood pressure	37.72(56.52,23.6)		Low physical activity	41.95(53.66,30.63)
Female	Secondhand smoke	64.16(71.64,55.5)		Secondhand smoke	63.66(71.08,55.7)		Diet low in milk	97.97(99.81,96.17)		Diet low in milk	98.43(99.99,96.62)		Diet low in milk	98.43(100,96.55)
	Discontinued breastfeeding	48.92(53.32,44.53)		Ambient particulate matter pollution	46.12(58.36,24.46)		Diet Low in Omega-6 Polyunsaturated Fatty Acids	82.72(95.33,49.41)		Diet Low in Omega-6 Polyunsaturated Fatty Acids	82.81(95.3,48.07)		Diet Low in Omega-6 Polyunsaturated Fatty Acids	80.89(95.35,42.99)
	Ambient particulate matter pollution	46.33(59.24,24.54)		High temperature	33.48(40.54,26.24)		Secondhand smoke	72.82(77.33,65.47)		Diet high in sodium	77(96.93,41)		Diet high in sodium	68.89(95.7,25.43)
	High temperature	33.26(40.27,26.06)		Unsafe sanitation	29.02(38.06,21.43)		Diet high in sodium	53.66(90.56,18.96)		Secondhand smoke	65.75(71.38,57.71)		Diet low in whole grains	64.74(73.65,54.9)
	Non-exclusive breastfeeding	31.12(40.35,23.56)		Unsafe water source	27.21(43.92,15.79)		High LDL cholesterol	45.41(66.87,28.75)		Diet low in whole grains	54.64(62.75,44.95)		Lead exposure	54.93(64.48,0)
	Unsafe sanitation	28.85(37.98,21.27)		Low temperature	26.45(30.27,23.55)		Ambient particulate matter pollution	45.22(55.16,26.44)		Diet high in red meat	50.43(70.07,0)		Diet high in red meat	53.35(72.65,0)
	Unsafe water source	27.03(43.7,15.68)		Nitrogen dioxide pollution	18.41(55.59,0)		Diet high in red meat	40.49(57.42,0)		High LDL cholesterol	47.6(62.9,34.51)		Low physical activity	53.16(63.91,42.53)
	Low temperature	26.37(30.19,23.49)		High body-mass index	16.25(17.64,14.89)		Diet low in whole grains	37.37(43,30.12)		Lead exposure	47.1(56.21,0)		High systolic blood pressure	52.77(76.16,30.38)
	Short gestation	18.68(21.97,15.28)		Bullying victimization	10.05(17.83,5.18)		High temperature	33.06(39.94,25.97)		Ambient particulate matter pollution	45.71(55.24,26.86)		Secondhand smoke	51.47(58.16,43.17)
	Nitrogen dioxide pollution	18.64(55.73,0)		No access to handwashing facility	6.71(7.91,3.33)		Diet low in nuts and seeds	28.9(36.65,20.96)		High systolic blood pressure	39.89(63.06,21.01)		High LDL cholesterol	47.93(58.62,38.45)
